# Supplementary material for: Poroptosis: A form of cell death depending on plasma membrane nanopores formation
Source: PubMed Central journal article supplement (PMC9194171; doi:10.1016/j.isci.2022.104481), 2022-05-30
Supplement: mmc1.pdf [file mmc1.pdf]

iScience, Volume 25

## **Supplemental information**

### **Poroptosis: A form of cell death depending on plasma membrane nanopores formation**

**Hao Li, Zihao Wang, Xiaocui Fang, Wenfeng Zeng, Yanlian Yang, Lingtao Jin, Xiuli Wei, Yan Qin, Chen Wang, and Wei Liang**

**Figure S1**

A

|      |                                        |
|------|----------------------------------------|
| pM1  | RPPLSQDTFSRLWDLIPRYGRKKRRQRRR          |
| pM2  | DMTRVVDDCPRRDCCSRYSRYGRKKRRQRRR        |
| pM3  | DMTRVVDDCPRRDCCSRRRYGRKKRRQRRR         |
| pM4  | DVRYLRRDNTFDDSVVVPYRPPRVGSRYGRKKRRQRRR |
| pM5  | DVRYLRRDNTFDDSVVVPYRRRRRRRRR           |
| pM6  | DGDRDFRMFDRLNRALRLDRYGRKKRRQRRR        |
| pM7  | SQIPASRQRTLGGDDLYRRDQQDIVYCSNRLGR      |
| pM8  | RGAVTTSQIPASRQRTLVDPDYGRKKRRQRRR       |
| pM9  | DPDVLTRQRSAPIQSTTVAGRYGRKKRRQRRR       |
| pM10 | DRTYTMDRVLFYLGQYIMTDDYGRKKRRQRRR       |
| pM11 | DRTYTMDRVLFYLGQYIMDDRRRRDRRD           |
| pM12 | RLLGRLFGVPSFSVKRDDDYGRKKRRQRRR         |
| pM13 | DRDDDIYTMIDNLVVVNQQRYGRKKR RQRRR       |

B

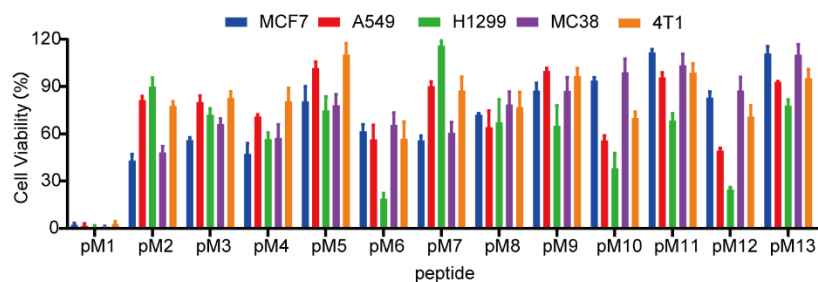

**Figure S1. Tumoricidal effects of various peptides on several different tumor cell lines.**

Related to Figure 1.

(A) Amino acid sequences of thirteen peptides.

(B) Cell viability of different tumor cells treated by 100  $\mu$ M of various peptides for 24 h.

Data are representative of three independent experiments; all the error bars represent SDs.

**Figure S2**

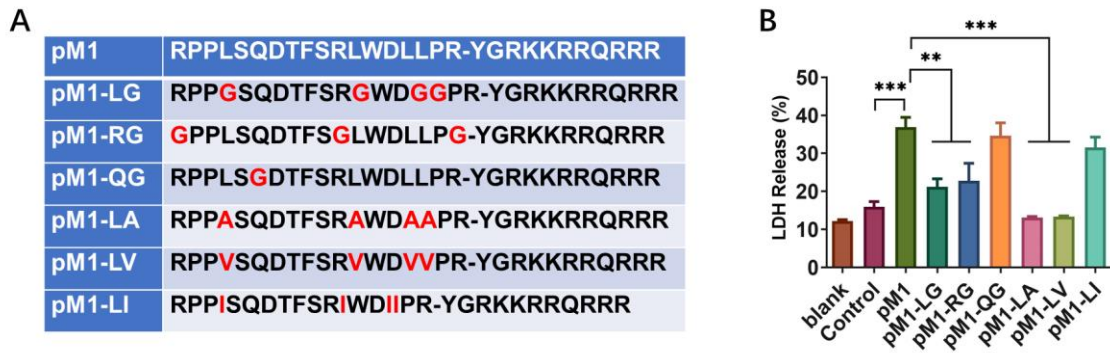

**Figure S2. The charge of ppM1 peptide affects its toxicity to tumor cells.** Related to Figure 1.

- (A) pM1 polypeptides with different amino acid substitutions.
- (B) LDH release of MDA-MB-231 tumor cells treated with pM1 polypeptides with different amino acid substitutions at a concentration of 100  $\mu$ M

**Figure S3**

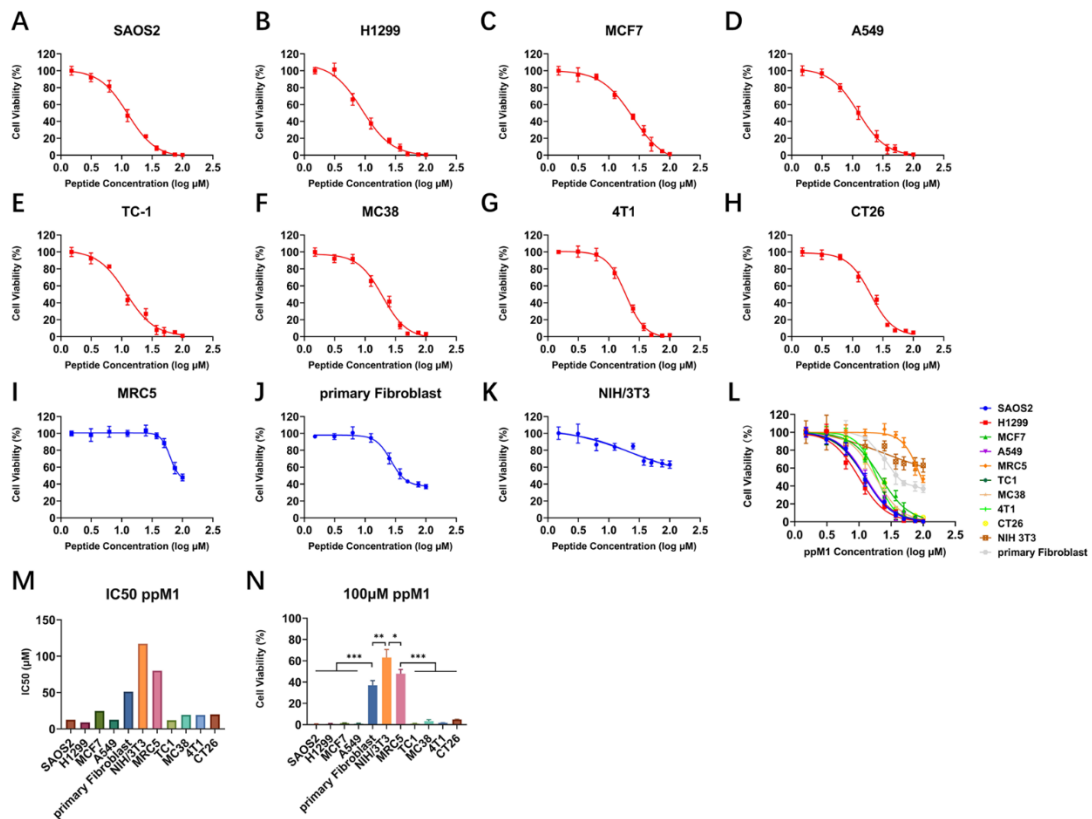

**Figure S3. Cytotoxicity of ppM1 peptide on tumor cells and normal cells.** Related to Figure 1.

(A-L) Survivorship curves of SAOS2, H1299, MCF7, A549, TC-1, MC38, 4T1, CT26, MRC5, primary fibroblast from mouse tail, NIH/3T3 cell lines treated with ppM1 for 24h.

(M) Comparison of IC<sub>50</sub> between tumor cell lines and normal cells, measured by MTT experiments.

(N) Cytotoxicity evaluation by MTT experiment on several tumor cell lines and normal cells treated with 100  $\mu\text{M}$  ppM1 for 24 h.

Data are representative of three independent experiments; all the error bars represent SDs.

**Figure S4**

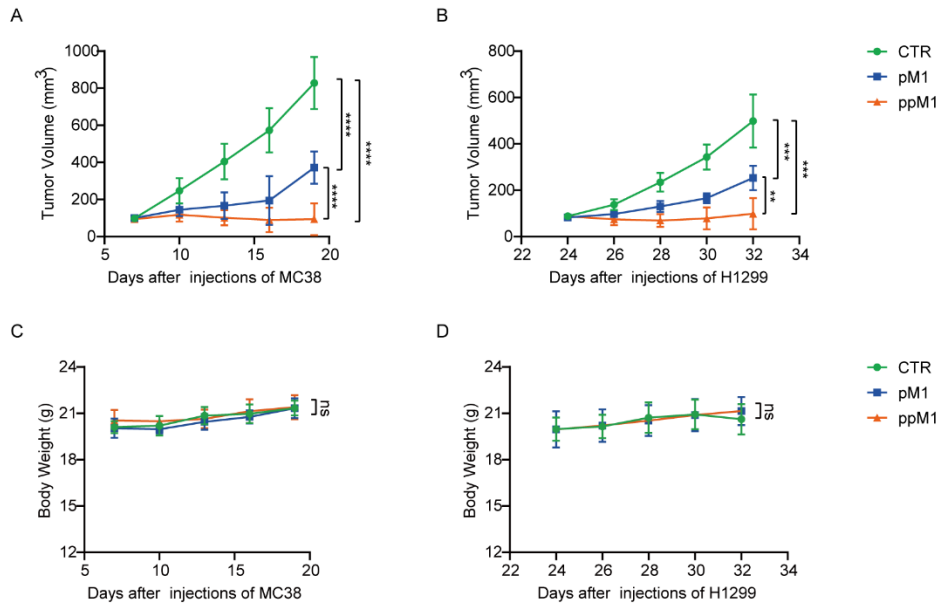

**Figure S4. pM1 and ppM1 treatment suppressed tumor growth in vivo.** Related to Figure 1.

Mice were treated with vehicle or pM1 or ppM1 after tumor volume reached 50-100 mm<sup>3</sup> (intratumor injection 25mg/kg, every other day for 3 doses).

(A and C) Average tumor volume (A), average body weight (C) on MC38 tumor-bearing C57BL/6 mice (n=7-8).

(B and D) Average tumor volume (B) or average body weight (D) on H1299 tumor-bearing nude mice (n=6).

All error bars represent SDs. Data was analyzed with two-tailed unpaired t test. \*\*p < 0.01; \*\*\*p < 0.001; \*\*\*\*p < 0.0001.

**Figure S5**

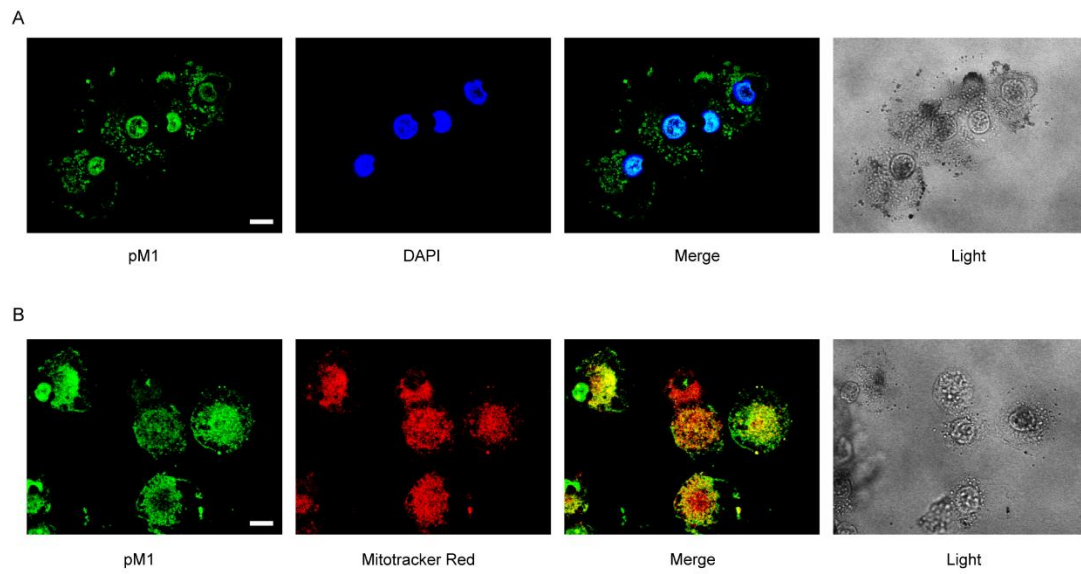

**Figure S5. pM1 preferentially condensed in the nucleus after crossing plasma membrane.**

Related to Figure 2.

H1299 cell morphology observation after treated with 10  $\mu$ M pM1 for 2h, green, blue and red was respectively representative of pM1-FITC, cell nucleus(A) and vitalized mitochondrion(B).

Figure S6

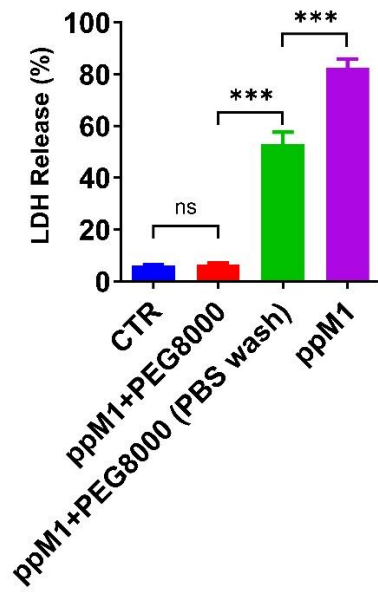

Figure S6. Removal of PEG8000 restored ppM1-induced MC38 cell death. Related to Figure 2.

**Figure S7**

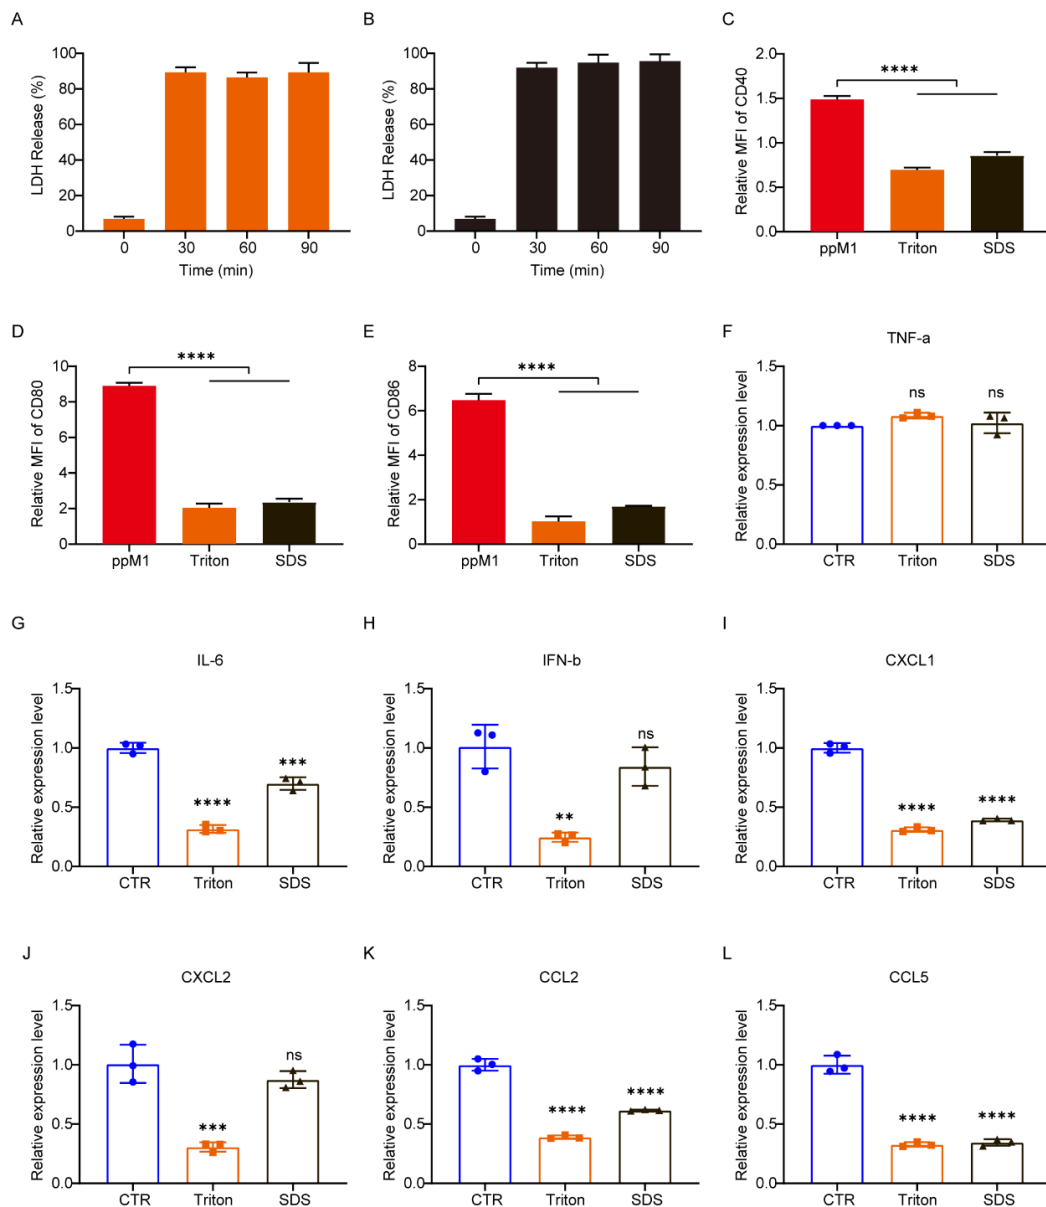

**Figure S7. Detergents induced MC38 cell acute death and failed to result in ICD.** Related to Figure 3 and Figure 4.

(A-B) Concentrations of extracellular LDH following MC38 cells treated by 0.1% Tritonx-100 (A) or 80 mg/ml SDS a(B) at various times.

(C-E) Flow-cytometry measurements of BMDC maturation markers, CD40(C), CD80(D), CD86(E) after coculturing with necroptotic MC38 cells induced respectively by ppM1, Tritonx-100 or SDS.

(F-L) Relative expression level of cytokine and chemokine genes following MC38 cells treated by 0.1% Tritonx-100 or 80 mg/ml SDS for 30 mins. TNF- $\alpha$  (F), IL-6 (G), IFN- $\beta$  (H), CXCL1 (I), CXCL2 (J), CCL2 (K), CCL5 (L).

Data are representative of three independent experiments; all error bars represent SDs. (C-L) was analyzed with 1-way ANOVA. \*\*p < 0.01; \*\*\*p < 0.001; \*\*\*\*p < 0.0001.



**Figure S8**

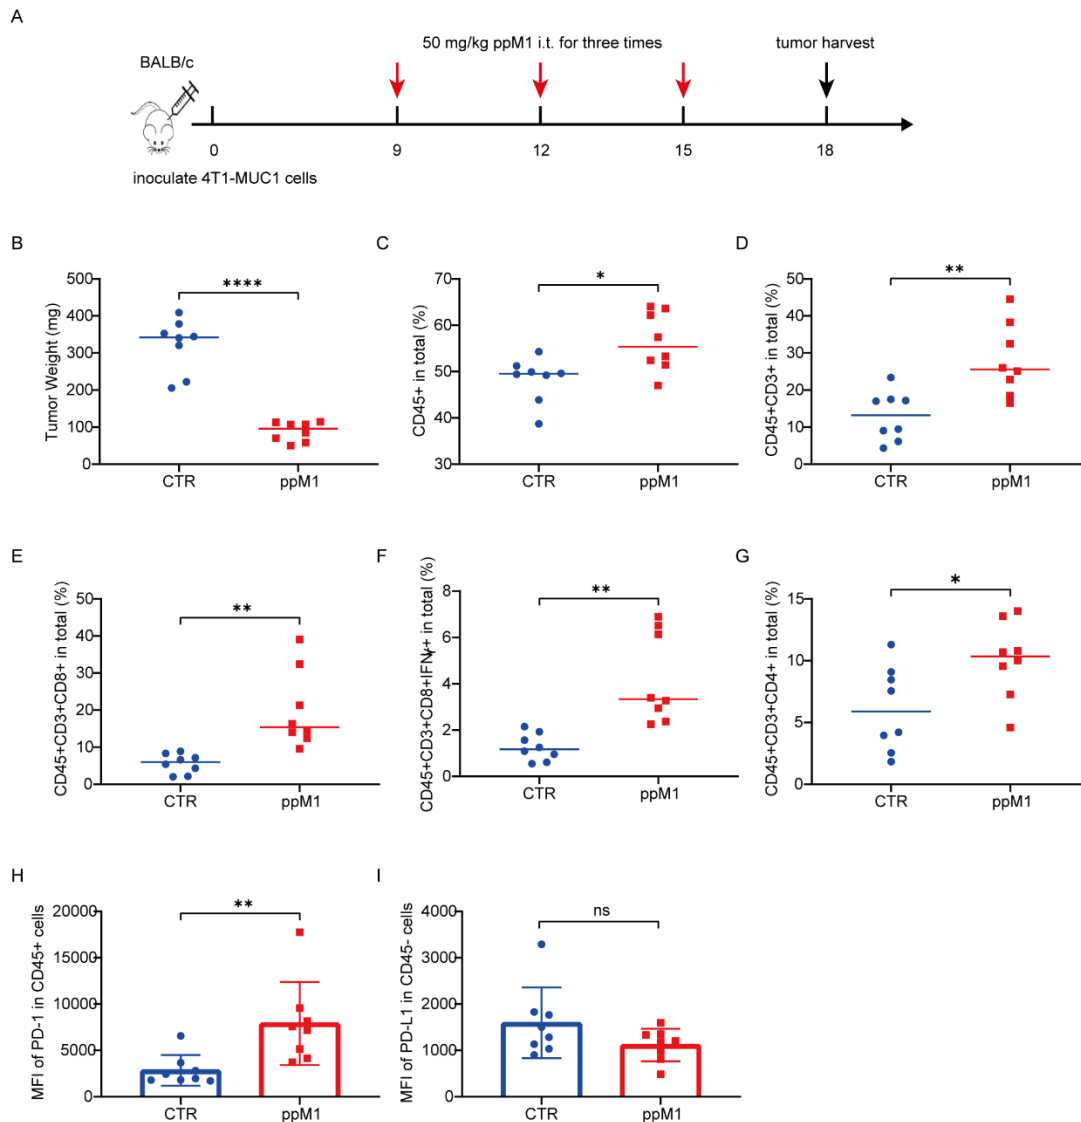

**Figure S8. ppM1 treatment improved T cell infiltration on 4T1-MUC1 model.** Related to Figure 5

4T1-MUC1 tumors (n=8) were harvested on day 18 and stained for an array of immune cell markers before analyzed by flow cytometry.

(A) The schedule of experiment.

(B) Weight of tumor harvested on day 18.

(C-I) Immune profiles assay of tumor with or without ppM1 treatment, CD45+ leukocytes (C), CD3+ T lymphocytes (D), CD8+ T cells (E), IFN- $\gamma$ + cytotoxic T cells (F), CD4+ T cells (G), mean fluorescence intensity of PD-1 on CD45+ cells (H), mean fluorescence intensity of PD-L1 on CD45- cells (I).

Each dot represents data for one mouse and error bars represent SDs in (B-I). Data was analyzed with two-tailed unpaired t test; \*p < 0.05; \*\*p < 0.01; \*\*\*p < 0.001; \*\*\*\*p < 0.0001.

**Figure S9**

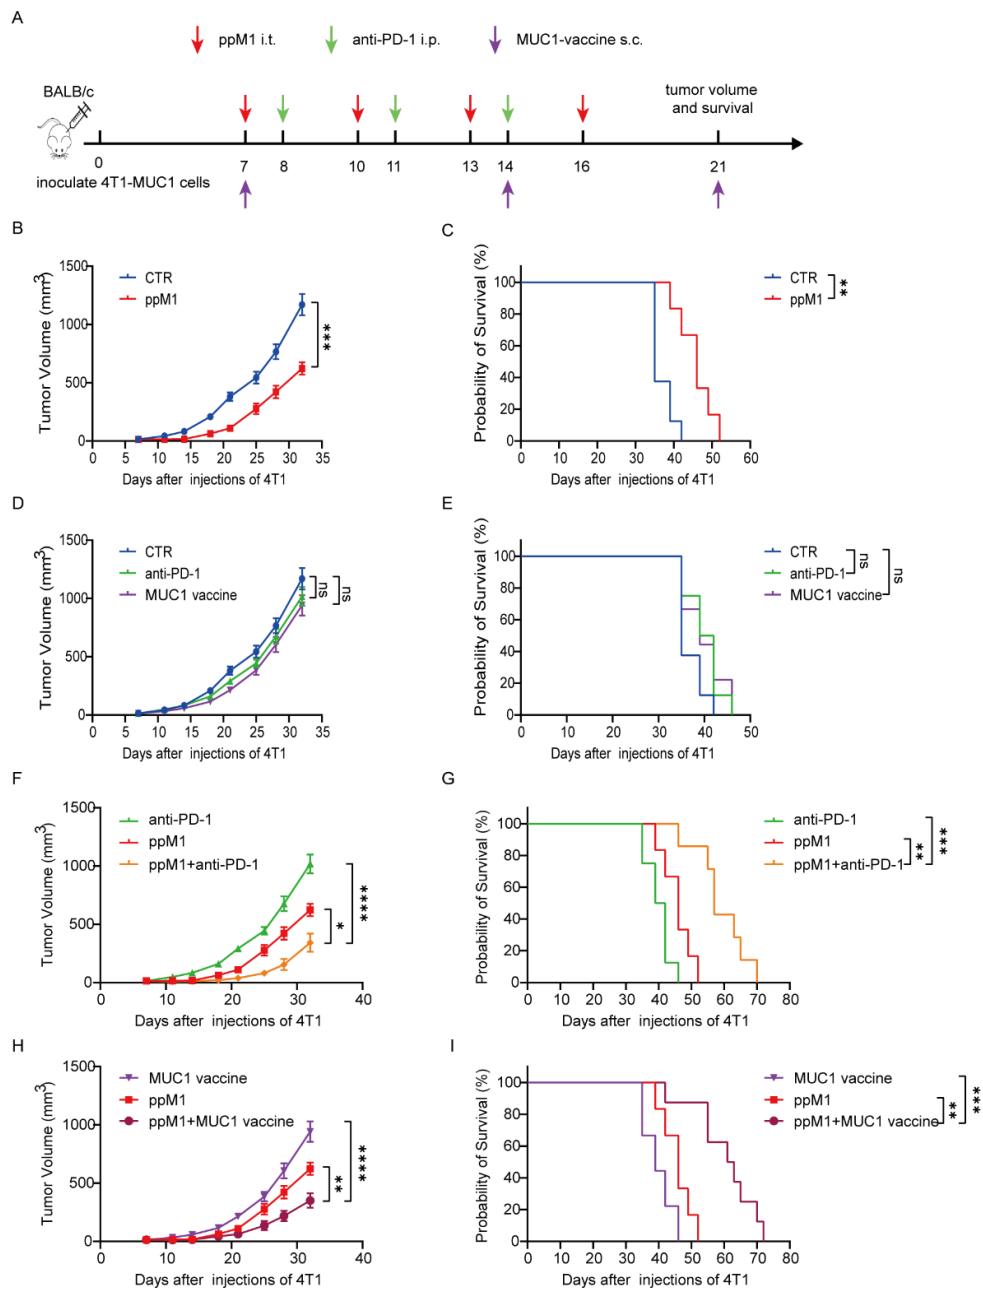

**Figure S9. Antitumor efficacy of ppM1 or ppM1 combined with immunotherapy on 4T1-MUC1-BALB/c model.** Related to Figure 5

(A) The schedule of experiment, ppM1(75mg/kg) was intratumorally injected (every 3 days, for 4 doses) from day 7 after tumor inoculation (n=6-9), PD-1 mAb (200 mg/dose/mouse) was i.p. injected (every 3 days, for 3 doses), MUC1 vaccine was s.c. injected (once a week, for 3 weeks).

(B-I) Average tumor volume (B) (D) (F) (H), survival curves (C) (E) (G) (I).

All error bars represent SEMs. (B) (D) (F) (H) was analyzed with two-tailed unpaired t test; (C) (E) (G) (I) was analyzed with log-rank (Mantel-Cox) test. \*p < 0.05; \*\*p < 0.01; \*\*\*p < 0.001; \*\*\*\*p < 0.0001.

Figure S10

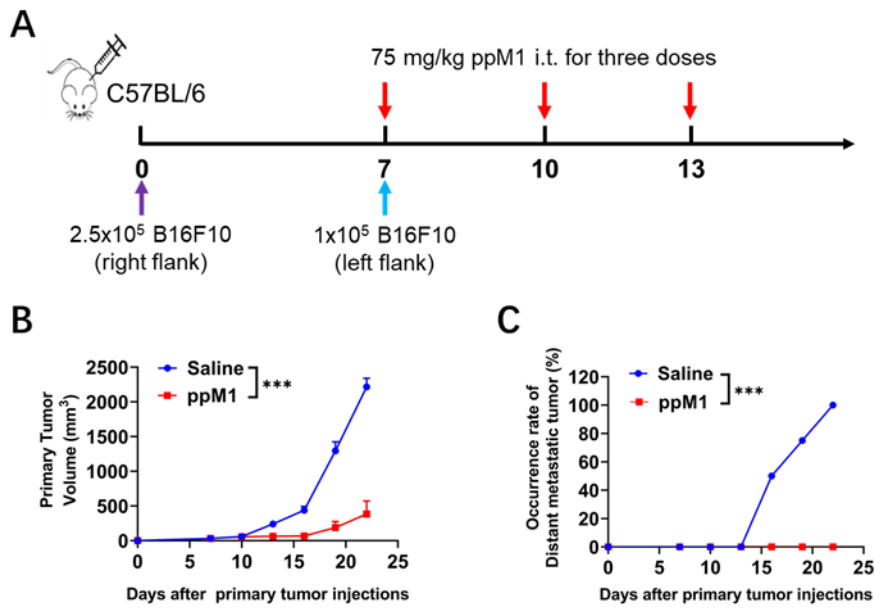

**Figure 10. Antitumor efficacy of ppM1 on B16F10-C57BL/6 model.** Related to Figure 6  
(A) The schedule of experiment, ppM1(75mg/kg) was intratumorally injected (every 3 days, for 3 doses) from day 7 after primary tumor inoculation (n=4)  
(B) Average primary tumor volume, (C) Occurrence rate of distant metastatic tumor  
All error bars represent SEMs. (B) (C) was analyzed with two-tailed unpaired t test, \*\*\*p < 0.001;

**Figure S11**

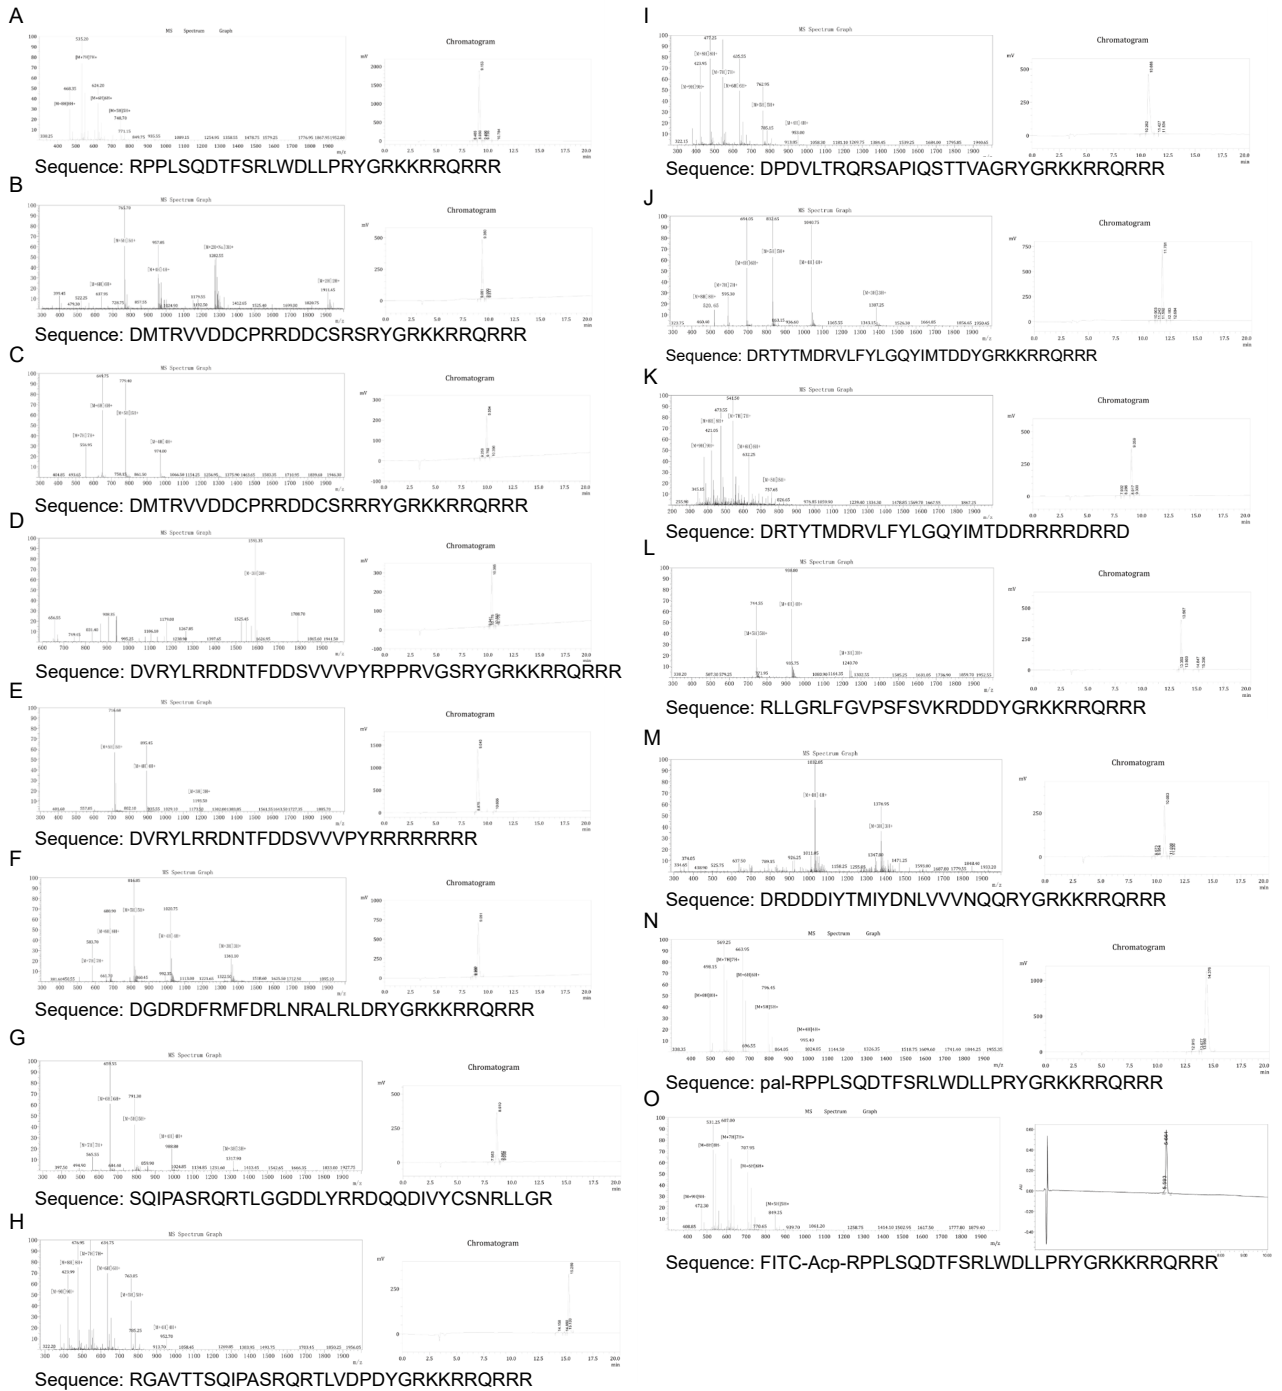

**Figure S11. mass spectrometry and high-performance liquid chromatography results of the peptides in this study. Relate to Figure 1**

(A-M) MS graph (left) and chromatogram (right) of pM1-pM13, respectively.

(N) MS graph (left) and chromatogram (right) of ppM1.

(O) MS graph (left) and chromatogram (right) of FITC-pM1.
